# Supplementary material
Source: publisher figshare collection journal article supplement (https://gsajournals.figshare.com/ndownloader/files/12786011)
Supplement: Supplementary file 1 [file 12786011]

## Sheet: All 103 MTAs sorted by Chr & bp
Table S1. List of the 103 Marker Trait Associations (MTAs) that were signficant (pvalue ≥ 3.0) for yield, maturity, height, lodging, or seed mass in the soybean NAM population. The MTAs are ordered by the Wm82.a2.v1 assembly chromosome number and base pair position of the 103 SNP markers (listed by name and ssid), and the estimated cM position of those SNPs on the WxP linkage map. The sign and ma…
								Founder # >	2	3	4	5	6	8	9	10	11	12	13	14	15	17	18	22	23	24	25	26	27	28	29	30	31	32	33	34	36	37	38	39	40	41	42	48	50	54	64
								Founder Name >	TN05-3027	4J105-3-4	5M20-2-5-2	CL0J095-4-6	CL0J173-6-8	HS6-3976	Prohio	LD00-3309	LD01-5907	LD02-4485	LD02-9050	Magellan	Maverick	S06-13640	NE3001	Skylla	U03-100612	LG03-2979	LG03-3191	LG04-4717	LG05-4292	LG05-4317	LG05-4464	LG05-4832	LG90-2550	LG92-1255	LG94-1128	LG94-1906	LG97-7012	LG98-1605	LG00-3372	LG04-6000	PI 398.881	PI 427.136	PI 437.169B	PI 518.751	PI 561.370	PI 404.188A	PI 574.486
	MTA SNP Marker		Chromosome		Wm82.a2.v1	SNP cM position	MTA		- - - - - - - - - - - - - - - - - - - - - - - - - - - - - - - - - - - - - - - EL founder families - - - - - - - - - - - - - - - - - - - - - - - - - - - - - - - - - - - - - - -																	- - - - - - - - - - - - - - - - - - - - - - - - - - - - - - - - - BX founder families - - - - - - - - - - - - - - - - - - - - - - - - - - - - - - - - -															- - - - - - - - - - - - PI founder families - - - - - - - - - - - -
Trait	Name	ssid	No	Interval	SNP position	on WxP RIL Map	pval	Trait units									Allelic effect																Allelic effect											Allelic effect
Seed mass	Gm0144639502AG	1235973842	1	1	45501408	56	7.01	g(100 seed)-1	-0.106774	-0.141128		-0.0820841	-0.139384	-0.183798		-0.18994	-0.154788	-0.120731	-0.154372	-0.0555321	-0.134347	-0.171125		-0.0152832	-0.16284	-0.0345528	-0.321488	-0.166402	-0.154969	-0.0625619	-0.0996558		-0.143263	-0.122982		-0.114365		-0.123795	-0.0685848					-0.128678	-0.12112	-0.00506859	-0.204599
Seed mass	BARC101Gm0150831484AG	715580158	1	2	51717031	83	4.13	cm			0.128491	0.144331	0.10284		0.133849			0.0522219	0.0892082				0.0480736	0.129882	0.0697887	0.109962							0.110768		0.0751143	0.0544933			0.111538			0.0652913		0.088721		0.0668566	0.0782762
Yield	Gm02180036CT	1235974656	2	1	180034	0	3.06	kg ha-1	-22.4537			-18.7871				-3.34118	-5.85657				-2.61855	7.27718	-0.314452	17.0308	3.71466	-10.7867			22.1858	-1.58848	5.34707	-10.9373	-14.8175	-9.54215	-13.5327	-5.44715	31.3847	-32.6304	0.208194				-2.10912	-3.93817	-19.1556	-20.1872	0.604062
Height	Gm026027712GT	1235975071	2	2	6086859	29	13.35	cm	1.61613	1.90919	1.58064	1.26029	1.19614	1.8295	1.93308	1.5025	1.50599	1.64703	1.91735	1.83497	1.87515	1.70309	1.53099		2.11356	1.69887	1.29916		1.49764	1.52199	2.17795	1.49886	1.57862	1.50574	2.10971	1.82944	0.975714	1.71582	0.478858	1.62492	1.51355	1.58588	1.84379	1.62928	1.28891		1.55671
Maturity	BARC101Gm026029356TC	715583700	2	2	6088503	29	6.77	days	0.45187	0.576353	0.334592	0.448582	0.330147	0.522707	0.689624	0.499012	0.292211	0.424881	0.454099	0.64116	0.530852	0.631434	0.407725		0.538565	0.467993	0.0718199		0.416155	0.398102	0.555654	0.422546	0.382517	0.517093	0.658153	0.572897	0.289353	0.461741	0.152467	0.473403	0.254675	0.434365	0.45795	0.331436	0.392451	0.421387	0.431201
Seed mass	Gm026286649CA	1235975087	2	2	6362970	31	3.89	g(100 seed)-1	-0.107607	-0.0808767	-0.110025	-0.083767	-0.0897935	-0.0982887	-0.0916545	-0.107222	-0.0960641	-0.0960217	-0.102903	-0.0856935	-0.104479	-0.0597347	-0.108783	-0.0793213	-0.103192	-0.15882	-0.128751	-0.0967468	-0.0729551	-0.0673014	-0.0677428	-0.0983922	-0.0917787	-0.074812	-0.124812		-0.0789282		-0.0462497	-0.0780228	-0.119004	-0.0846957	-0.0906771	-0.0901412	-0.0638934	-0.0872853	-0.063021
Height	Gm03588585CT	1235975955	3	1	587640	5	5.46	cm	0.479171	0.587716	0.617591	0.648811	0.582386	0.589498	0.628295	0.651794		0.679274	0.657352		0.996145	0.555706	0.451992	0.90051	0.419421	0.896159	0.709668	0.699556	0.50716	0.820546	0.584627	0.762124	0.655238		0.552838	0.624436	0.644383	0.589583	0.791936	0.714232	0.577535	0.818897	0.763376	0.724385	0.863751	0.748763	0.593643
Maturity	BARC101Gm031374930TG	715584457	3	1	1396937	9	3.37	days																			-0.0196168		0.0948392		0.217							-0.286197	-0.122296		-0.189198		0.639159		0.792487		0.521673
Seed mass	BARC101Gm032373742TC	715584839	3	2	2383419	17	6.3	g(100 seed)-1														0.156772	0.188012	0.0904547			0.0793403								-0.107257	0.254105	0.193966		0.26973				-0.00417931
Yield	Gm032419305GA	1235975369	3	2	2428982	17	3.44	kg ha-1	8.01757	25.76	18.3388	11.6974	13.048		6.75836	11.6896	12.185		12.3651		15.6465	17.4386	3.94224	19.2218	28.2421	22.4927	24.1874	24.4273	12.1138	14.6068	8.56732	6.46492	9.01575			12.0263	16.5634	12.1361	6.19589	16.7194	4.6596		8.10532		10.4806	6.14785	13.8562
Lodging	BARC101Gm034929896CT	715586710	3	3	4739176	26	3.22	score 1 to 5																															0.0869289
Yield	BARC101Gm0310014176CA	715584335	3	4	9499045	32	3.24	kg ha-1	-14.0664	-12.3167				-17.9924				-26.5266	-16.1948		-16.8045		-17.618	-15.8051	-11.4756		-16.7936			-14.1629			-18.426	-20.2929	-11.4025	-19.9795	-30.8315		-19.9444		-28.5546			-18.0422		-20.7429
Height	BARC101Gm0334741364AG	715585260	3	5	32698446	47	3.15	cm		-0.0426143							-0.767361				0.621019		-0.0254288										-1.90018	-0.0210092					1.48418		-0.324393					-0.34016
Lodging	BARC101Gm0336438792GT	715585454	3	6	34416830	51	3.17	score 1 to 5														0.0210513		0.0343485					0.00803808		0.0136511			0.0129669	0.0259836		0.0168259	0.0682106	0.0346214				0.0261535
Yield	Gm0347293766GT	1235975816	3	7	45292481	112	7.76	kg ha-1	-20.067			-20.5135				-26.255	-22.5969	-24.4089	-33.051	-22.9673	-15.5684	-32.9235	-24.3042	-17.7036		-30.2973	-21.7902	-23.0188	-26.98	-16.3292	-22.8125		-24.0547	-25.0632	-27.7362	-28.2307	-33.335	-30.0571	-13.093		-21.7818	-27.2046	-18.7001	-24.3596	-17.5437	-29.2633	-18.87
Seed mass	Gm0347528196GA	1235975825	3	7	45526799	113	4.58	g(100 seed)-1	-0.0987026			-0.0773528			-0.100379	-0.0889153	-0.0966817	-0.0700395	-0.0871305	-0.0858092	-0.08005	-0.080532	-0.0800233	-0.0777904		-0.0882691	-0.030954	-0.0850186	-0.0811127	-0.0594118	-0.0829078		-0.0806522	-0.106988	-0.100333	-0.106581	-0.0586779	-0.0827271	-0.0785393		-0.0661976	-0.0852192	-0.0690507	-0.0679783	-0.0902075	-0.101422	-0.0836709
Seed mass	BARC101Gm042705645CT	715587536	4	1	2763169	13	3.35	g(100 seed)-1		0.0275938		-0.0476411	0.0149368				-0.0743523						-0.0282115	-0.0282727		-0.114342		-0.0564952			0.0324921	-0.00908516			-0.0465561	-0.128269			0.0749381		0.0848384	0.048815	-0.123071	-0.112569		-0.116969	0.00816341
Lodging	BARC101Gm045592124CT	715589084	4	2	5658722	30	4.31	score 1 to 5								-0.0616721	-0.00665662	-0.017669			-0.0499051					-0.0390559		-0.0282995								-0.042362			-0.00186254
Seed mass	BARC101Gm0729570952CT †	715597060	4	3	18476477	57	3.68	g(100 seed)-1																															0.247092
Maturity	BARC101Gm0419442133CT	715587316	4	3	20605543	58	3.97	days																															0.181925		-1.26863					-1.4747
Height	BARC101Gm0430188045TC	715587624	4	3	24300386	58	3.12	cm							0.984977		1.23812		0.856257							0.943944	1.12603	0.93752			1.19075	0.958062				1.06561	0.612311		1.25029	0.921714			1.20285
Lodging	BARC101Gm0441446602TC	715588090	4	3	44593740	62	3.99	score 1 to 5																															0.126637
Seed mass	Gm054190784GA	1235977469	5	1	5905686	44	3.31	g(100 seed)-1	0.054514	0.0281603	0.0786931	0.0491351	0.053925	0.0591337	0.0471588	0.048882	0.0458117	0.0144898		0.0696171	0.0511574		0.00613272	0.0281588	0.060821	0.0234805	0.114978	0.0293227	0.0946236		0.0511101		0.0709386	0.075142	0.0468055		0.0663813	0.038128	0.0146511	0.0209426	0.0369008		0.0860229	0.0291635	0.0843376		0.0818225
Lodging	BARC101Gm0535207696AC	715591161	5	2	35478418	81	3.21	score 1 to 5			0.00663383				0.0246575											0.0177588					0.018244	0.0278075						0.120899	0.0041491		0.038688	0.0114133		0.029302		0.0186523
Height	BARC101Gm0617230927CA	715593713	6	1	17276210	104	3.74	cm									-0.401672	-0.749326		-0.563838			0.0857489						-0.42318		-0.36783				0.785324	-0.559919			0.259069				1.47409	-0.45432	2.52738		1.91939
Seed mass	Gm0617988853GA	1235978263	6	1	18055732	107	3.06	g(100 seed)-1	-0.106815	-0.0737632	-0.0836649	-0.0941718	-0.0899707	-0.0910641	-0.0835032	-0.100603	-0.0486126	-0.0852488	-0.0774552	-0.111385	-0.107508	-0.110454	-0.0899026	-0.0839382	-0.0879926	-0.0868249	-0.136557	-0.122981	-0.0800138	-0.0826064	-0.0621959	-0.0870627	-0.0795316	-0.0904314	-0.104471	-0.0887258	-0.117382	-0.0614362	-0.0669341	-0.076033	-0.0823436	-0.0836877	-0.090485	-0.0908547		-0.0778947
Maturity	BARC101Gm0646675806GA	715594652	6	2	47222913	125	7.06	days																															-0.0719102						2.03371
Yield	BARC101Gm0650641085CT	715595312	6	3	51316639	162	9.29	kg ha-1						27.2385								44.9539						11.9839		-17.401			-184.726		-272.712	-137.713		-200.475	31.4627				-323.485				-291.201
Maturity	BARC101Gm074008483CT	715597942	7	1	4036328	26	9.9	days	-1.05995	-0.638117			-0.367497	-0.361971	-0.903888	0.177578		-0.652402	-0.162701		-0.785121		-0.00300198		-0.725499	-0.585983		-0.373305		-0.813317	0.0674915		-0.511148	-0.103449	0.0371189		-0.113578		-0.542991		-0.305261	-0.0913934		0.198202	-0.55013	-0.521654	-0.0533301
Lodging	Gm075077544CT	1235978710	7	2	5125260	33	8.06	score 1 to 5	-0.0678131	-0.0518062	-0.0253837	-0.0381081	-0.036668		-0.0641096	-0.0325836	-0.0115071	-0.0549287	-0.0316497	-0.0266358	-0.0543221	-0.00432102	-0.023518	-0.0177877	-0.046839	-0.0375634	-0.0808672			-0.0367587	-0.0477699	-0.0404956	-0.0503383	-0.0571453	-0.0316367	-0.0206628	-0.0276481	-0.0425998	-0.0398815	-0.0323218	-0.0509737		-0.0355309	-0.0390598	-0.0218892	-0.0297121	-0.041994
Height	BARC101Gm075213223GA	715598311	7	2	5251993	34	7.13	cm	-1.49396	-1.26949	-1.00367	-1.17629	-1.14346		-1.5475	-0.868179	-1.08545	-1.22198	-1.2657	-1.07892	-1.40404		-1.28622	-0.794597	-1.24364	-1.52357	-0.977401			-0.995374	-1.26919	-0.910235	-1.33362	-1.0927		-0.776616	-0.995313		-0.839523	-1.17636	-1.36904		-0.806609	-1.01197	-1.08511	-0.974395	-1.28152
Seed mass	Gm077832406TC	1235978889	7	3	7871780	45	14.43	g(100 seed)-1	0.220221	0.12748			0.159635	0.204788	0.0584426	-0.0123841	-0.0899035	0.093264	0.0272836	-0.0134404	0.182961	0.270147	0.0298787		-0.00416133			0.119745	0.0695304	0.17876	0.129513	0.193888	0.0781512	0.180822	0.00211385	0.0671818	0.0562373	0.0853503	0.225159	0.0860752	0.0101163	0.158058	-0.0605709	0.0247481	-0.00515277	0.0261923	0.0132735
Seed mass	BARC101Gm0715330002CA	715596397	7	4	15417090	64	4.49	g(100 seed)-1														0.189558													0.0692371			-0.137835	0.224026		0.115266			0.075122		0.00814959	0.0933158
Seed mass	BARC101Gm0737249021AG	715597548	7	5	37154618	92	5.35	g(100 seed)-1		0.0108931					-0.0307962					-0.0987173		-0.0409802	0.192603	0.0183454					-0.0360892				-0.0146457					0.268021	0.215427	0.00252767			-0.0229245		0.134631		0.0475567
Lodging	BARC101Gm0740945201CT	715597998	7	6	40896029	110	3.66	score 1 to 5		0.00679813	0.0107103	0.022257	-0.00325549	0.0135233	0.00254561	0.0353	-0.0259952		0.00560184	0.0176253	0.0437059	0.00690282	0.0162762		0.0229122	0.0318393	0.0131382	0.00292596		0.0126889	0.0118504	0.00633776	0.0187331		0.0182539	0.0101836	0.0121955	-0.00790754	0.00658	0.00606137	0.00890142	0.0078647	0.0233016	0.0204577	0.0055654	0.0229722	0.0185325
Yield	BARC101Gm0742450573AG	715598109	7	7	42396323	119	3.34	kg ha-1	-8.29148	3.18123		-0.921396	17.9081	15.1755		-0.391202	2.33192				1.1212		20.7744			-12.7989		12.7389		-16.7948		6.25289			-26.4316		-19.8808	-7.13016	-9.80703	23.3041	-13.076	7.97694	4.99485	-6.44033	-27.7713	-21.2467
Maturity	BARC101Gm085295769AG	715602578	8	1	5304827	33	5.85	days			-0.0736577	-0.0157167	-0.227806			-0.0314798	-0.074915	-0.0330325			-0.178208			-0.762011	0.617256	0.135278					0.0449319		-0.289404	-0.305161			-0.769713								-0.188118		-1.11917
Height	BARC101Gm085960619CT	715602620	8	1	5968621	36	3.01	cm																									-1.11036				-1.35567	-0.745984							-0.560903		-1.64578
Yield	BARC101Gm0846945161AG	715602531	8	2	47796376	178	3.18	kg ha-1															15.573			-4.12209							-133.517				-143.731	-142.091	57.2393	156.615
Maturity	BARC101Gm09104404TC	715602941	9	1	106196	1	3.51	days		0.0931967	0.155705		1.06275	0.341504	1.03369							2.00545	1.35464					0.310538		2.75144							-1.16215		-0.265605				1.09896		2.65883		3.38846
Yield	BARC101Gm09104404TC	715602941	9	1	106196	1	10.77	kg ha-1		87.5714	144.236		238.569	72.5472	55.7812							87.9081	24.3946					58.0075		24.9931							-164.481		8.6428				-298.33		-325.75		-266.137
Seed mass	BARC101Gm091723633GA	715603155	9	2	1738859	12	3.37	g(100 seed)-1			0.0662781	0.063204	0.0678685		0.0501771		0.0623131	0.085041		0.0464756	0.0669698	0.090623			0.0841308	0.0864087				0.0825381	0.076911		0.0952212		0.0789242	0.0583881	0.0816082	0.057351	0.0396781	0.0725609	0.0469952	0.0683804	0.0605865	0.10551	0.0659789	0.0614036	0.0689711
Seed mass	BARC101Gm0932838454AG	715603632	9	3	35446094	64	7.69	g(100 seed)-1		0.175873		0.116059				0.128895	0.215197			0.15309	0.184988		0.0651881		0.18467	0.14516	0.0675705	0.114241			0.164959		0.1223		0.223412	0.0835762	0.153422	0.157683	0.137695	0.151167	0.117606	0.177124	0.159224	0.204972	0.210307	0.163099	0.165286
Lodging	BARC101Gm1335242360TC †	715615765	9	4	40958591	83	4.46	score 1 to 5					0.0193677			-0.00099765					0.0449537	0.0110131	0.0161991			0.0693503	0.0152251			0.0186339		0.021444	0.0265832		0.0531589	0.0413243		0.0329251	0.0340876		0.0206407	0.039298		0.0280619	0.0524834	0.0225906
Height	BARC101Gm1335242816GA †	715615766	9	4	40959047	83	8.47	cm			-0.0228361	-1.07487	-0.563348	-0.523444	0.274883	-1.24993		-0.813368	-0.928122	-0.758255			-1.42555	1.17409	-0.929304	2.29417	-0.721096		-0.0208535			-0.0928991	-0.218955		2.01954	0.966155	1.69122	-0.0407396	-0.104124	-0.232272	0.617067		2.31593	0.156691	1.89848	0.00239188	-1.16085
Maturity	BARC101Gm0942526589TC	715604612	9	5	45722700	115	3.24	days		-0.243002	-0.150038						-0.0899102		-0.0836259				-0.285319		-0.468254						-0.33419	-0.202123							-0.398212		-0.328391	-0.171421				-0.208863	-0.437516
Seed mass	Gm1036744954CT	1235980540	10	1	37272391	61	3.72	g(100 seed)-1	0.0230839		0.127047	0.0619265		-0.0795841	0.0140399				0.0249312			0.114892	0.10332	0.170262	0.0743436		0.108435	0.0677537	0.0463449	0.0962845		0.0644688				0.109682	0.0434935	-0.0212179	-0.0124447		0.210036	0.136801		0.04634		0.158481
Height	BARC101Gm1044532915GA	715607455	10	2	45110885	112	77.62	cm																											-6.63669		-7.42606	-7.98025	-0.785403				-8.02117	-6.28158	-6.42972		-5.49842
Lodging	BARC101Gm1044532915GA	715607455	10	2	45110885	112	34.02	score 1 to 5																											-0.19719		-0.161213	-0.0987875	-0.0547334				-0.175168	-0.180185	-0.169257		-0.163883
Maturity	BARC101Gm1044532915GA	715607455	10	2	45110885	112	232.43	days																											-5.30999		-4.86826	-5.41999	-0.0431767				-4.69199	-5.26405	-3.94503		-4.59951
Seed mass	BARC101Gm1044532915GA	715607455	10	2	45110885	112	13.04	g(100 seed)-1																											0.257503		0.499459	0.184578	0.195927				0.195549	0.301393	0.36303		0.444342
Yield	BARC101Gm1044532915GA	715607455	10	2	45110885	112	40.77	kg ha-1																											-125.445		-146.509	-182.029	16.2278				-79.9287	-135.828	-107.855		-70.1984
Height	BARC101Gm1046788615AG	715607686	10	3	47384837	123	11.84	cm									-0.315826																					-4.84937	-0.460666				-4.22835				-3.64107
Seed mass	BARC101Gm114938752TC	715610801	11	1	4948302	26	4.76	g(100 seed)-1																								0.0784667							0.0490174				0.429518
Maturity	BARC101Gm115625500AG	715610878	11	1	5634587	28	4.42	days																			2.09742												0.28002
Yield	BARC101Gm118095797GA	715611194	11	2	8106372	44	3.92	kg ha-1	20.3656	23.6969	25.2811	23.3296	22.8973	14.9152		23.2053	21.5162	21.9105			25.5223				24.0313		32.9643			18.9501	19.3604			19.5921				14.9147	12.3719					20.9335	12.0915
Maturity	BARC101Gm1118663081AG	715609578	11	3	12556955	87	8.52	days									0.175345	0.0649046				0.421923							0.356102	0.511824	0.452968		0.31572						0.04178						1.00329		0.975904
Seed mass	BARC101Gm1136469908TC	715610262	11	4	31994782	93	5.45	g(100 seed)-1	-0.0328344	-0.0957797	0.0321535	-0.123012	-0.101052		-0.0472515	0.0117199	-0.0325414		-0.0800928	-0.0430314	-0.0793894			-0.0356459	0.00845503							-0.108018			-0.30881	-0.0415754	-0.0602375	-0.21458	-0.081505						0.131312		-0.0370693
Yield	BARC101Gm1138648336AG	715610584	11	5	33885696	97	3.43	kg ha-1
Seed mass	Gm122894203CA	1235981835	12	1	2890595	14	6.88	g(100 seed)-1	-0.0583142	-0.0743374	-0.112057	-0.104676	-0.114129	-0.103688	-0.0734466	-0.101533	-0.0476505	-0.0859206	-0.117575	-0.0913868	-0.0754175	-0.080741	-0.0952023	-0.103094	-0.108414	-0.105933	-0.146578	-0.0945477	-0.106077	-0.0750815	-0.0875808	-0.100587	-0.0872389		-0.103057	-0.0968107	-0.100165	-0.133326	-0.113756	-0.0728993	-0.12198	-0.0686884	-0.0581183	-0.126426	-0.103755	-0.0829961	-0.110433
Height	BARC101Gm124883456AC	715613121	12	2	4883898	28	3.78	cm							-0.65962			-0.455122				-0.586236		-1.76922															-0.789507				-0.704519
Maturity	BARC101Gm124883456AC	715613121	12	2	4883898	28	3.07	days							-0.278463			-0.0612373				0.00684906		-0.797587															0.0763535				-0.322242
Height	BARC101Gm126648692AG	715613310	12	3	6679988	41	3.75	cm							-0.587585								0.423192	-1.96671													-0.505023		-0.771822
Maturity	BARC101Gm128337984AG	715613568	12	4	8373158	50	4.09	days																2.08744															0.515038
Yield	BARC101Gm1240099279TC	715613054	12	5	40077424	107	4.21	kg ha-1										-42.7568												3.48608						-112.685			50.4206						-315.53
Lodging	BARC101Gm1310330320TG	715613721	13	1	11559403	2	3.39	score 1 to 5												0.0509399								-0.00946238				0.0496444				0.0107119	-0.0238834	0.0611548								-0.0281484
Seed mass	BARC101Gm1323400902AG	715614141	13	2	24887920	53	7.38	g(100 seed)-1											0.255673	0.191381								0.154785											0.148707						0.239124
Maturity	BARC101Gm1336355529CT	715615925	13	3	37496830	92	5.21	days																															0.477647				-0.0768503		1.3096
Yield	BARC101Gm1336823931GT	715616002	13	3	37965132	94	5.66	kg ha-1														-22.1613	-9.45376			-28.136				-25.1359			-24.161		-34.2523		-40.5158		-16.2962		-35.5675	-30.03	-34.8052	-34.3748	-21.1584	-23.8496	-17.1493
Lodging	BARC101Gm1338116142GT	715616083	13	4	39293625	100	26.32	score 1 to 5									-0.0531801	0.0196135		-0.0452829	0.134535			0.12919		0.262828		0.014435		0.00639187	-0.0347441				0.100143				0.0772711				0.17219
Height	BARC101Gm1338133840AC	715616085	13	4	39311323	100	67.78	cm									-2.75509	-1.07471		-2.044	5.71983			5.59121		8.13694	-2.00026	0.602993		1.49392	-2.07348				3.52004	1.52851			1.26579				7.5173
Lodging	BARC101Gm144770786CT	715619352	14	1	4856342	24	4.12	score 1 to 5	-0.022181		-0.0268669	-0.0263826	-0.0213591	-0.0208215					-0.0159444	-0.030704		-0.0273226		-0.0260067		-0.0273922	-0.028277	-0.0200659	-0.0225729	-0.0271892	-0.0274729	-0.0309606	-0.0224753	-0.029991			-0.0442672		-0.0294719				-0.020115
Seed mass	BARC101Gm145530899TC	715619689	14	2	5641328	30	3.08	g(100 seed)-1																			0.877332				0.0496504								0.120542
Maturity	BARC101Gm1446289371CT	715619121	14	3	45567917	78	3.11	days															-0.548389	-0.413282									-0.523855	-0.447603					-0.105233
Lodging	BARC101Gm1447013062GA	715619224	14	4	46306480	84	3.78	score 1 to 5										-0.0506543																					-0.0640758
Maturity	Gm158476963TC	1235983913	15	1	8517984	42	4.85	days	-0.107377	-0.216588	-0.137245	-0.28069	-0.260699			-0.193256	-0.366488	-0.296574	-0.126628	-0.274975	-0.217389		-0.34884	-0.018998	0.932945	-0.447935				-0.352255	-0.290571	-0.270051	-0.071739			-0.296116			-0.134976			-0.233032		-0.661524	0.0543123	-0.255975	-0.261189
Yield	BARC101Gm1512864272CT	715620493	15	2	12883590	64	3.1	kg ha-1									1.45283																						-28.8657				-72.1211
Seed mass	BARC101Gm1540070656AG	715621828	15	3	40815708	83	13.07	g(100 seed)-1		0.212371	0.0964792	0.144609	0.169699		0.143562	0.193547	0.172182					0.227779	0.165602				0.145951	0.136728			0.157363	0.172843	0.106663		0.139296	0.190143	0.174037	0.132005	0.169273		0.153414		0.133102	0.17321	0.165831	0.144419	0.151372
Yield	BARC101Gm1634511TC	715624722	16	1	34320	0	15.04	kg ha-1		39.4895	67.1437	31.5216	113.633	32.0576		38.9857	0.942553	-16.5203	41.4913	19.3323			7.51312	23.4858				24.1453	65.2563	8.00124			-79.823		-125.335			-87.6151	31.2364				-151.164	-119.662	-165.106		-135.625
Maturity	BARC101Gm1641667AG	715625071	16	1	41476	0	3.24	days		0.240788	0.079324	0.0511138	0.769621	0.37602		0.758269	0.474479	-0.779975	0.630047	0.705123			1.06953	0.472077				0.361289	0.582862	1.44438			0.691192		0.251328			0.789563	-0.279587				1.12621	1.13657	1.88065		1.20639
Seed mass	BARC101Gm1631987848AC	715624506	16	2	32477366	76	6.44	g(100 seed)-1	0.196074	0.135243	0.123861	0.125296	0.11122			0.131686		0.1068		0.0716608			0.128355			0.105516	0.149588	0.0867074	0.127598	0.12295			0.134803	0.0932656	0.11785	0.147019		0.0532554	0.0972662					0.126614	0.100532		0.111557
Yield	BARC101Gm1632300128CA	715624550	16	2	32798239	78	6.24	kg ha-1		30.1966	34.4898	38.4874	39.2629			35.374							7.93853			58.1693									55.1268				23.9377
Maturity	BARC101Gm173958581GA	715627604	17	1	3687958	20	3.85	days																0.905466												-0.0323743			0.133845								-0.0551792
Seed mass	BARC101Gm175608786TG	715628026	17	2	5341262	29	10.25	g(100 seed)-1	-0.0631576			-0.160019	0.038128	-0.0807869	-0.126595	-0.148878	-0.0173343	0.0478996	-0.0998758	0.0113632	-0.0170948	-0.0401912	-0.146559	-0.138338	-0.148597	-0.0552662	0.0335432	-0.0250707	0.0113955	-0.142259	-0.206853	0.0919593	-0.0670766		-0.0869757	-0.158578	0.154498	-0.0465494	-0.0434128	0.00621504		-0.241455	-0.256708	-0.151776	-0.24943	-0.154579	-0.178206
Yield	Gm177369313CT	1235984776	17	3	7100289	40	6.23	kg ha-1	-1.37929		-22.2318		0.437649	-13.3494	-27.5208	-27.6443			-8.24885	-5.61263	-11.1028	-5.30781	-14.0831	-29.0115			-16.8391		-8.83636			-1.73429	-24.3955	-8.89653		-17.5555		-33.267	2.36676		-35.0101		-41.4174	-7.09261	-13.699	-37.5321	-17.7693
Seed mass	BARC101Gm178194356CT	715628226	17	4	7924918	45	26.25	g(100 seed)-1				-0.33756			-0.378247	-0.343658	-0.123152	-0.120458							-0.483442	-0.110611				-0.321884	-0.323579				-0.419995	-0.221871			-0.0982753		-0.222677	-0.500056			-0.213065	-0.273165	-0.304346
Lodging	BARC101Gm181690566AG	715629280	18	1	1691002	12	9.8	score 1 to 5		0.0374119	0.0307701	0.0562893				0.0917253	0.056927	0.0585065	0.0141593	0.0488295	0.0958412								0.0442527	0.0327893					0.0188367		0.0332184			0.0237453				0.052196	0.0262703		0.03319
Yield	BARC101Gm181699011TC	715629286	18	1	1699447	12	4.17	kg ha-1		32.9305	3.53391	3.16466				23.542		-16.8461	3.25111	-27.6837	-26.5483								41.1263	2.08595					-27.1231		-12.9192			-26.2997				-12.4504	-17.8857		-20.1574
Seed mass	BARC101Gm181735487GA	715629312	18	1	1735923	12	8.84	g(100 seed)-1		0.191131	0.117084	0.193028				0.223007		0.115051	0.193761	0.150525	0.211693		0.179267						0.167925	0.13117					0.133462		0.144288			0.106106				0.0882741	0.148971		0.153851
Seed mass	BARC101Gm185971151CA	715632196	18	2	6008383	40	4.64	g(100 seed)-1		-0.0996644	-0.0751242	-0.0727647	-0.0823149	-0.0905924	-0.106858	-0.0767773								-0.0587454	-0.0649355	-0.129612	-0.111165	-0.0742562			-0.0522455				-0.0760941				-0.111922				-0.0651385	-0.11279	-0.0822899		-0.0647239
Yield	BARC101Gm1859603446CT	715632176	18	3	55331560	95	6.19	kg ha-1									-37.2846	-39.4105	14.2546						-60.3229	-24.0109									-3.5551				-10.187					-30.3528	-37.9103
Maturity	BARC101Gm1859607056GA	715632177	18	3	55335170	95	13.51	days		-0.305463	-0.0300646	-0.131105	0.0766203	-0.150661			-0.832217	-0.814919	-0.694853				-1.45949		-1.08661	-0.571673		-0.408228				-0.165462	-1.20799		-0.362067		0.0492553	-0.34552	-0.178549				-0.177941	0.230286	0.291644
Lodging	BARC101Gm1859902680TG	715632223	18	3	55622046	97	10.23	score 1 to 5															-0.130748										-0.136828						-0.0631778
Seed mass	BARC101Gm1859902680TG	715632223	18	3	55622046	97	5.29	g(100 seed)-1															-0.33029										-0.351582						-0.0620041
Height	BARC101Gm1859964857AC	715632230	18	3	55684223	98	42.7	cm									-1.77194		-1.53869				-8.47352		-2.09723	-1.54098							-7.23227		-0.522751				-0.435637				-1.76121		-1.74633		-2.10663
Yield	Gm191586092TC	1235985891	19	1	1630408	12	5.12	kg ha-1	-18.5082	-19.5019	-17.9795			-24.5876	-24.8395		-22.2455	-25.2577	-18.4879	-31.5278	-23.0955	-23.2934	-21.1182		-28.1613	-35.2903	-25.7568	-27.4467		-20.4098		-25.5795		-34.4274		-28.9527			-22.695		-24.9819	-22.1301	-26.8117	-29.6507		-24.7607
Height	Gm191587494TC	1235985893	19	1	1631810	12	15.71	cm	2.2228	2.17685	2.16996			1.93717	2.23754		2.61221	1.73913	2.56285	2.35783	1.93494	2.06555	1.43797		1.59272	1.80743	2.05673	1.87283		1.77165	2.2064	2.25772		1.88261		2.23646			2.39508		2.12068	2.3965	1.45885	0.493753		1.95641
Lodging	Gm191587494TC	1235985893	19	1	1631810	12	61.37	score 1 to 5	0.158553	0.116119	0.114146			0.12699	0.178887		0.164623	0.143355	0.161577	0.213975	0.158191	0.121859	0.132246		0.119619	0.144464	0.166458	0.148551		0.127875	0.165778	0.137503		0.189058		0.143045			0.149436		0.159958	0.168108	0.154097	0.0361551		0.192099
Yield	BARC101Gm198503521TG	715636420	19	2	8476550	28	4.75	kg ha-1	-19.0462						-20.1964								-20.9785			-38.5669				-23.416			-39.4659	-26.2074	-44.1708	-59.0682			6.86656				-45.0477	-22.5437
Yield	BARC101Gm1937916244TG	715634694	19	3	38126760	51	3.04	kg ha-1							43.821														30.4973										48.8286
Lodging	BARC101Gm1942246131AG	715635205	19	4	42447208	60	8.97	score 1 to 5	0.0286496			0.00347665		-0.00660946		-0.101573	-0.0433608	-0.0145105		0.0317526	0.00627246		-0.0314443	-0.0266171		0.0157152		0.00123796				0.0116349	0.0212637	-0.000732464	0.0531108	0.00880086	0.00579613	0.118655	0.0205287	0.00339838	0.00167942	0.000996545	0.0412764	0.00767661	0.00129493	0.0114367	0.0145015
Seed mass	Gm1942253248TG	1235986337	19	4	42454323	60	8.95	g(100 seed)-1	0.0438543			-0.0162784		0.0701575		0.17453	0.0657746	0.0300184		-0.107347	-0.0271945		0.0619927	0.0578449		-0.117343		-0.155834				-0.0712784	0.0184403	-0.0714987	-0.171401	-0.017146	-0.0166107	-0.33071	-0.286983	-0.0508579	-0.100163	0.030206	-0.090551	0.0258616	-0.0480533	-0.0918738	-0.0645873
Yield	Gm202787901AG	1235986648	20	1	2781194	27	3.93	kg ha-1	-14.2234	-19.5158		-20.2367	-20.8034	-14.5743	-15.298	-13.898	-21.2461	-9.45906	-14.244	-17.3276	-17.095		-23.0383	-24.1292	-10.7028	-21.8906	-28.0841	-22.0278		-23.4779	-20.3774	-18.0368	-21.354	-24.413	-27.4637	-16.2228	-19.1491	-19.8812	-11.6524	-20.4032	-20.4683	-17.1742	-14.9741	-19.5957	-26.3883	-17.0359	-17.8053
† SNP marker chr location in Wm82.a1.v1 assembly changed in the Wm.a2.v1 assembly.
